# Supplementary material for: Expeditious and eco-friendly fabrication of highly uniform microflower superstructures and their applications in highly durable methanol oxidation and high-performance supercapacitors
Source: Royal Society of Chemistry journal article supplement (doi:10.1039/c6ta04888a), 2016-01-01
Supplement: c6ta04888a1.pdf [file c6ta04888a1.pdf]

## **Supporting Information**

### **Expeditious and eco-friendly fabrication of highly uniform microflower superstructures and their applications in highly durable methanol oxidation and high-performance supercapacitors**

Sivaprakasam Radhakrishnan<sup>a</sup>, Hak-Yong Kim<sup>b,c</sup>, Byoung-Suhk Kim<sup>b,c\*</sup>

<sup>a</sup> Electrodeics and Electrocatalysis Division, CSIR-Central Electrochemical Research Institute,  
Karaikudie-630003, Tamilnadu, India

<sup>b</sup> Department of Organic Materials & Fiber Engineering, Chonbuk National University, 567  
Baekje-daero, Deokjin-gu, Jeonju-si, Jeollabuk-do 54896, Republic of Korea.

<sup>c</sup> Department of BIN Convergence Technology, Chonbuk National University, 567 Baekje-  
daero, Deokjin-gu, Jeonju-si, Jeollabuk-do 54896, Republic of Korea.

\*Corresponding Author: Byoung-Suhk Kim; E-mail: kbsuhk@jbnu.ac.kr

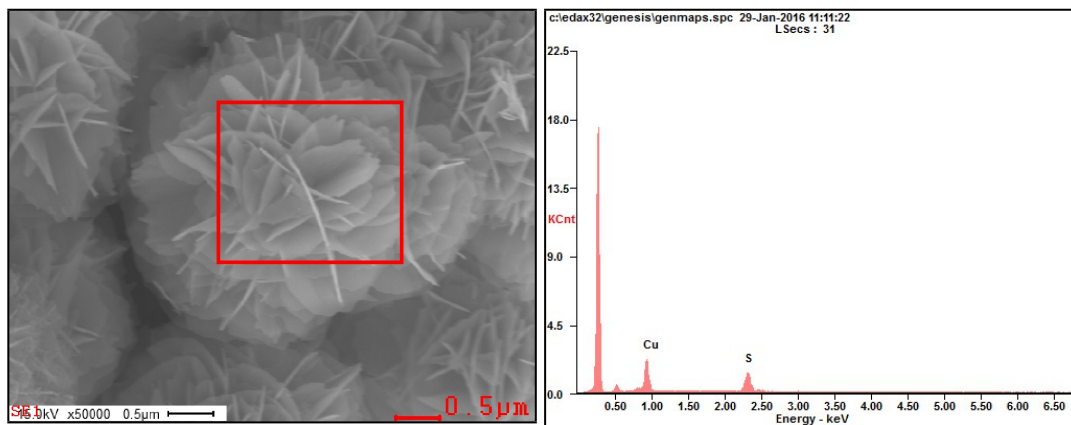

| <i>Element</i>   | <i>Wt%</i> | <i>At%</i> |
|------------------|------------|------------|
| <b><i>Cu</i></b> | 66.18      | 49.69      |
| <b><i>S</i></b>  | 33.82      | 50.31      |

**Fig. S1** Energy dispersive X-ray spectroscopy (EDX) and element composition for as-prepared CuS MF superstructure

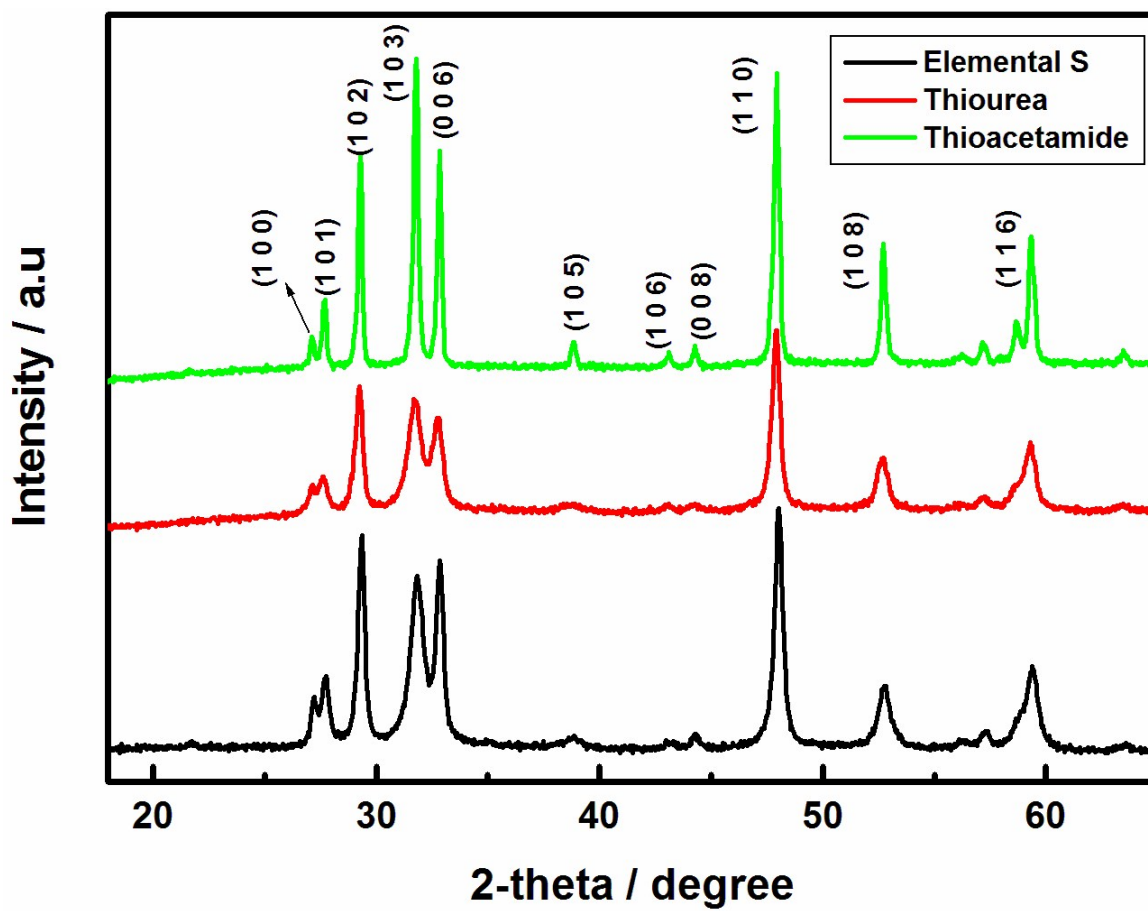

Fig. S2 XRD spectra of CuS product prepared in different sulfur sources

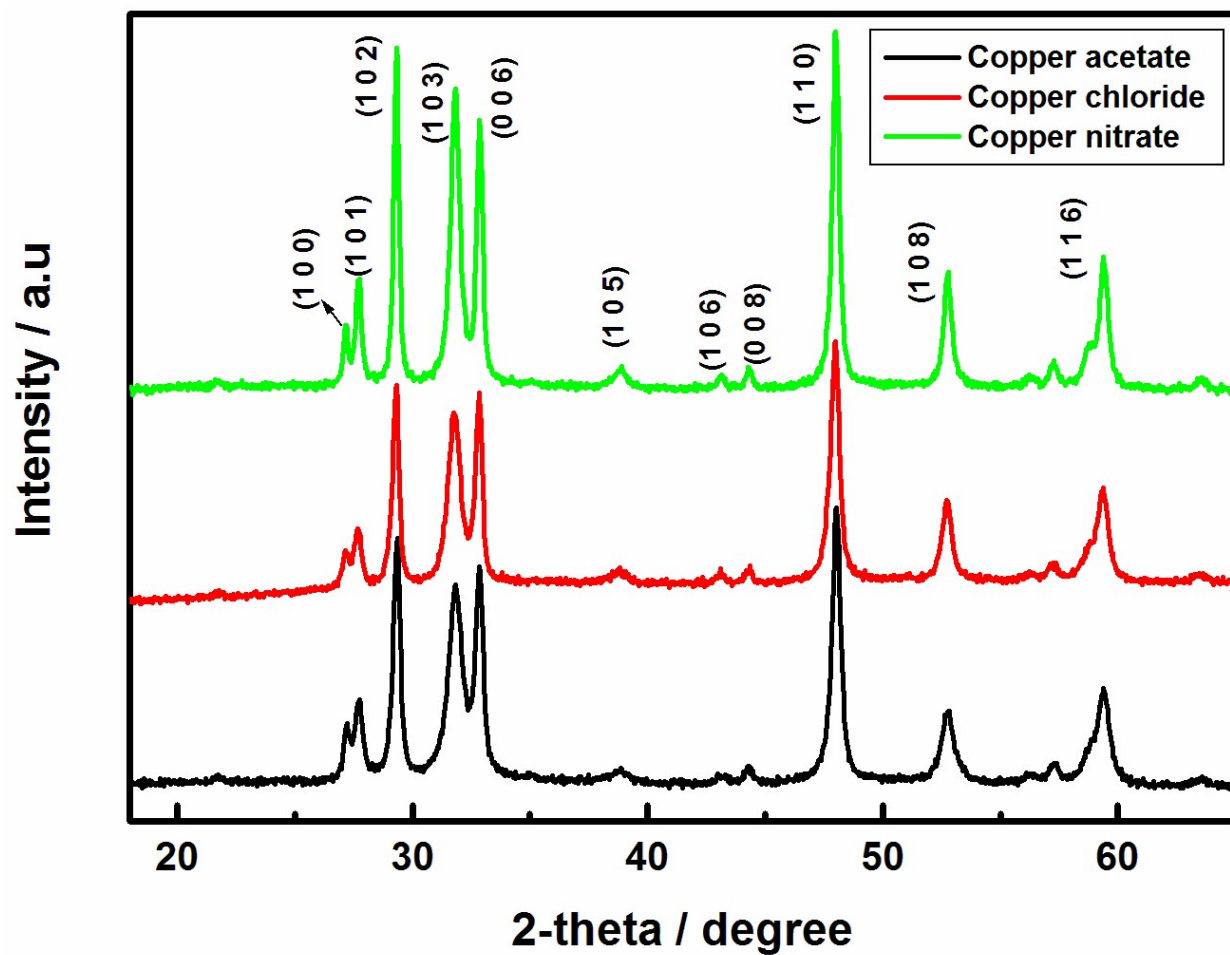

Fig. S3 XRD spectra of CuS product prepared in different copper sources

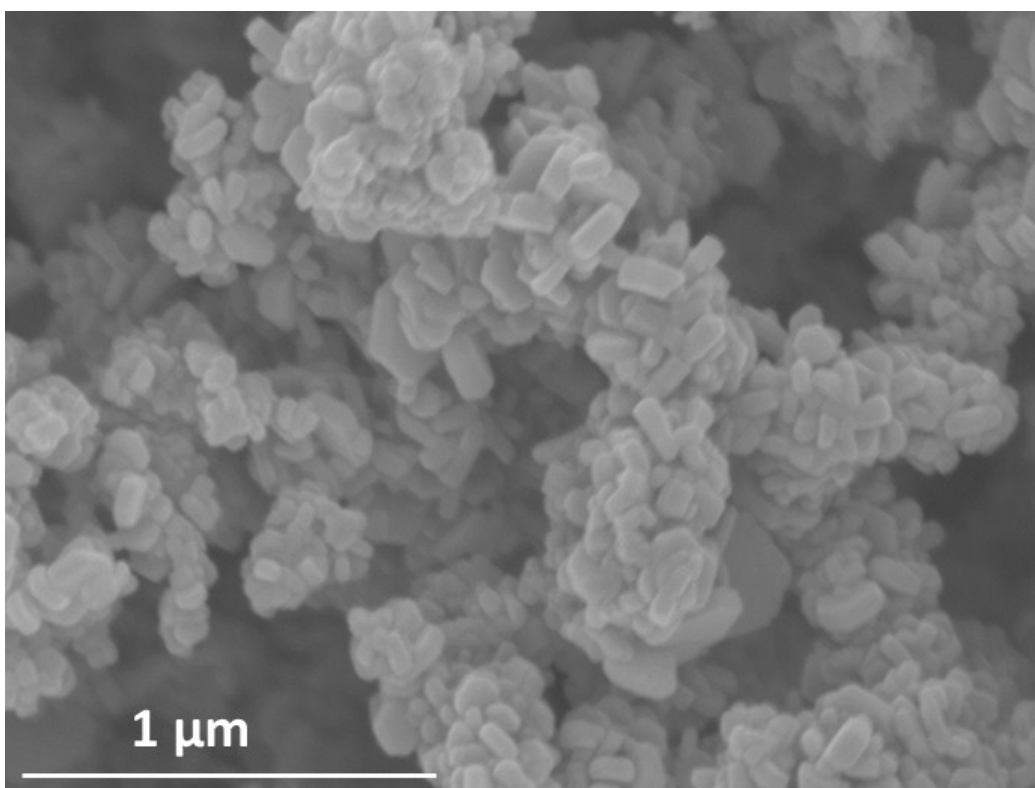

**Fig. S4** FE-SEM image of CuS product prepared in triethylene glycol as solvent

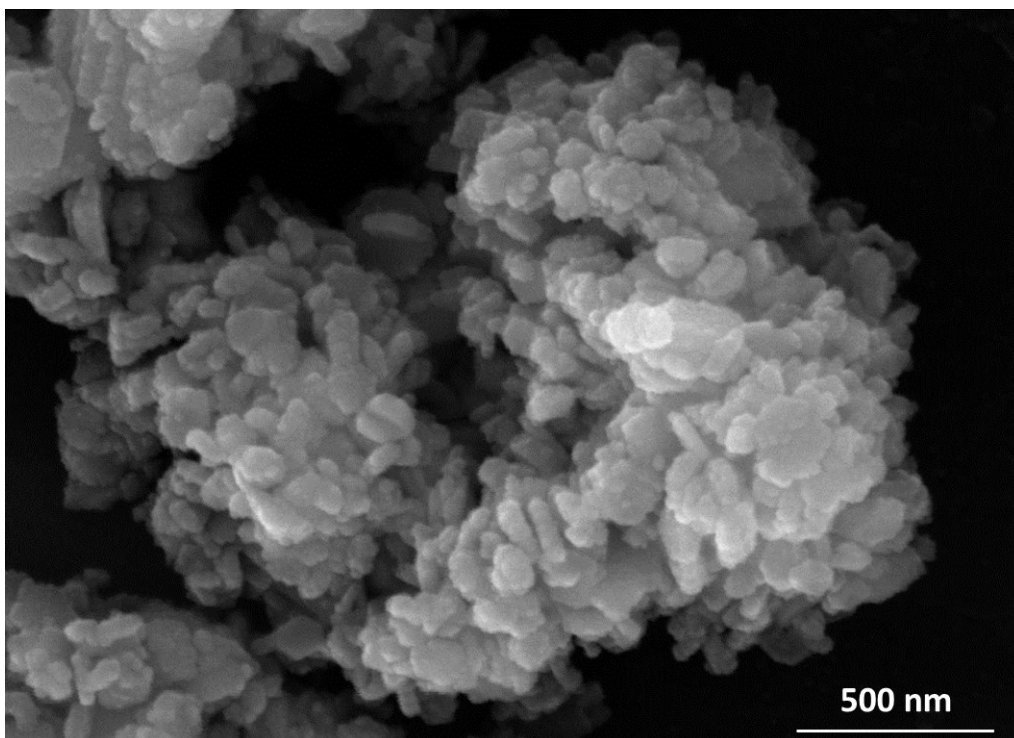

**Fig. S5** FE-SEM image of CuS product prepared in water as solvent

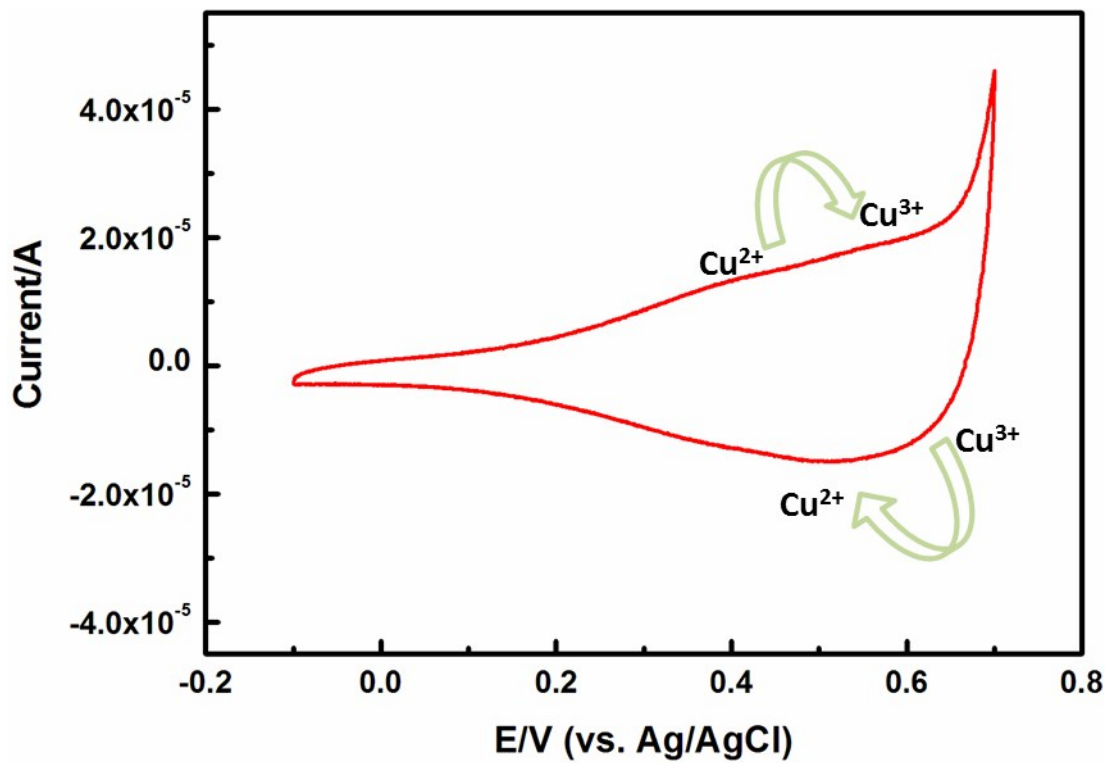

**Fig. S6** Cyclic voltammeter characterization of CuS modified GC electrode in 0.1 M NaOH solution as electrolyte in the potential window between -0.1 to 0.7 V at a scan rate of 50 mV/s.

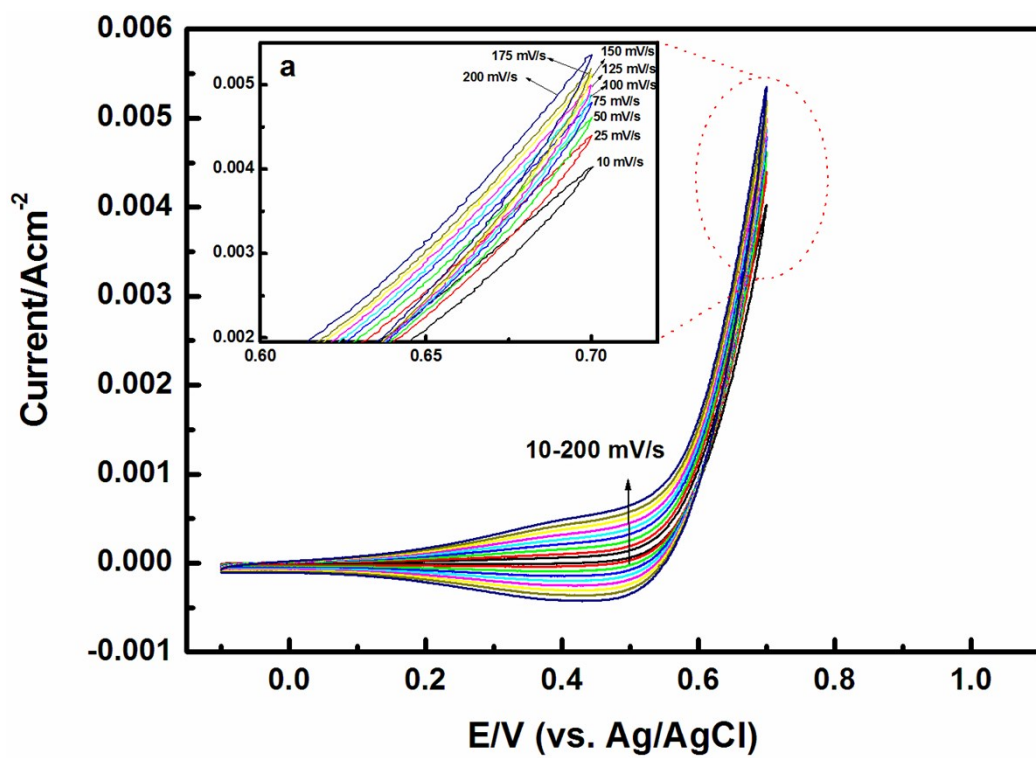

**Fig. S7** Cyclic voltammogram response of CuS modified GC electrode at different scan rate 10-200  $\text{mV/s}$  in 0.1 M NaOH solution containing 0.25 M methanol.



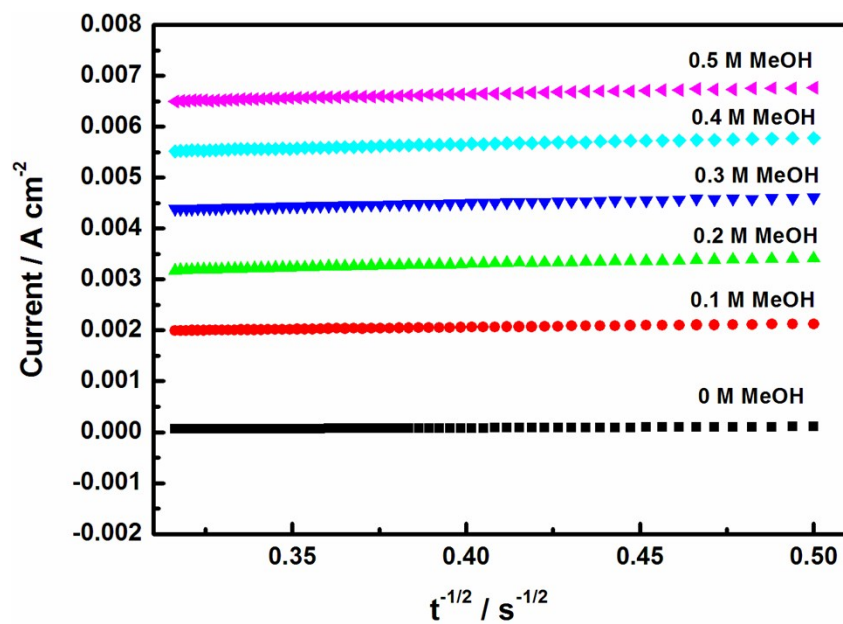

**Fig. S8** The dependence of the transient current density values at CuS modified GC electrode on  $t^{-1/2}$  in 0.1 M NaOH containing various concentration of methanol.

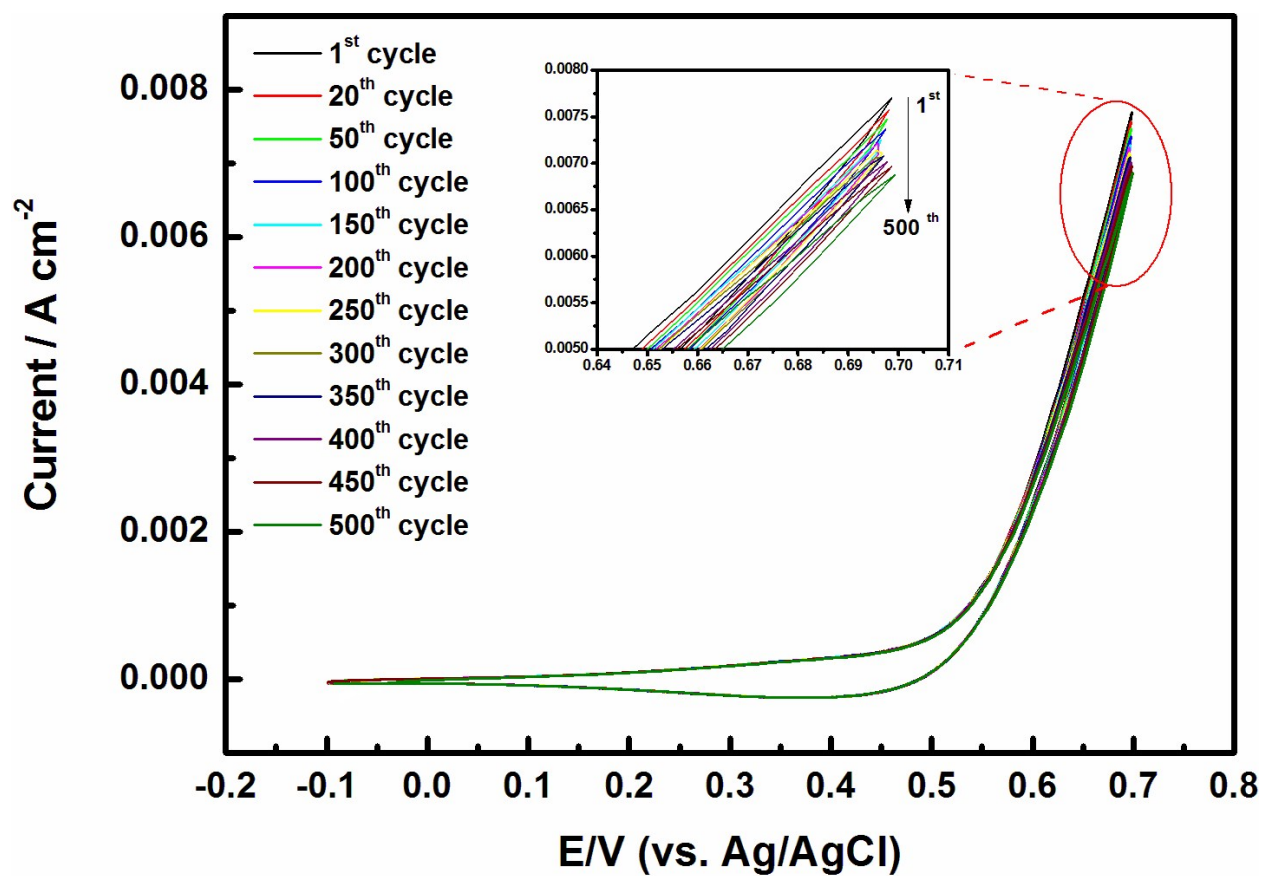

**Fig. S9** Cyclic voltammograms curves for the CuS modified electrode in 0.1 M NaOH solution containing 0.5 M methanol at a scan rate of 50 mVs<sup>-1</sup>. Inset shows the zoomed main panel

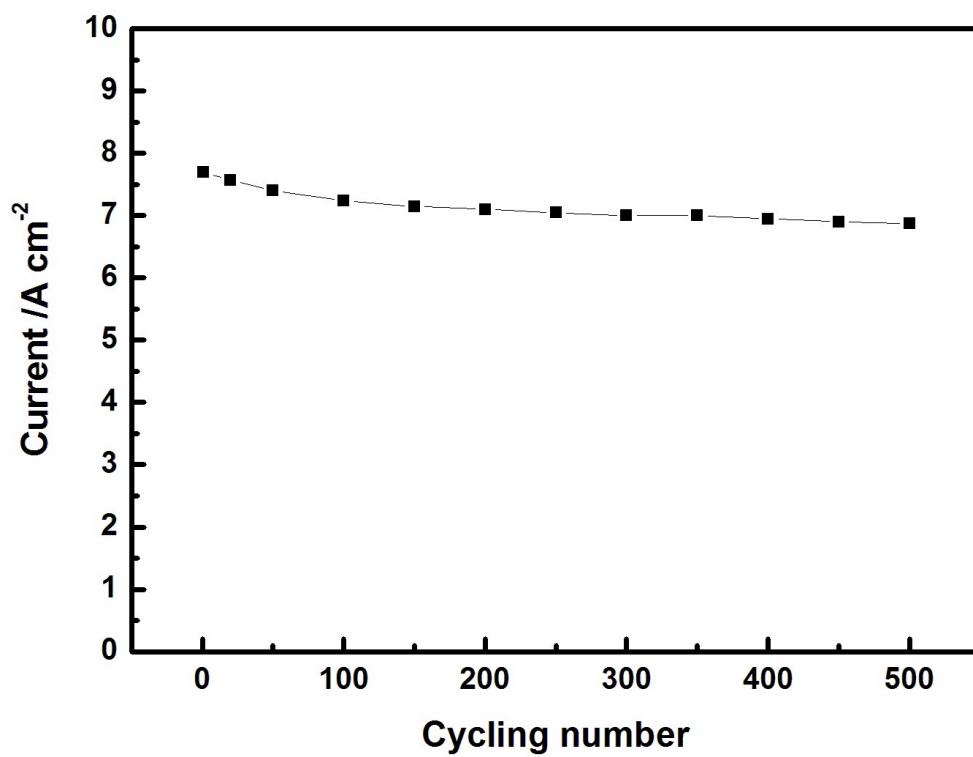

**Fig. S10** The variation of the peak current with cycling number for the CuS modified electrode in 0.1 M NaOH solution containing 0.5 M methanol.

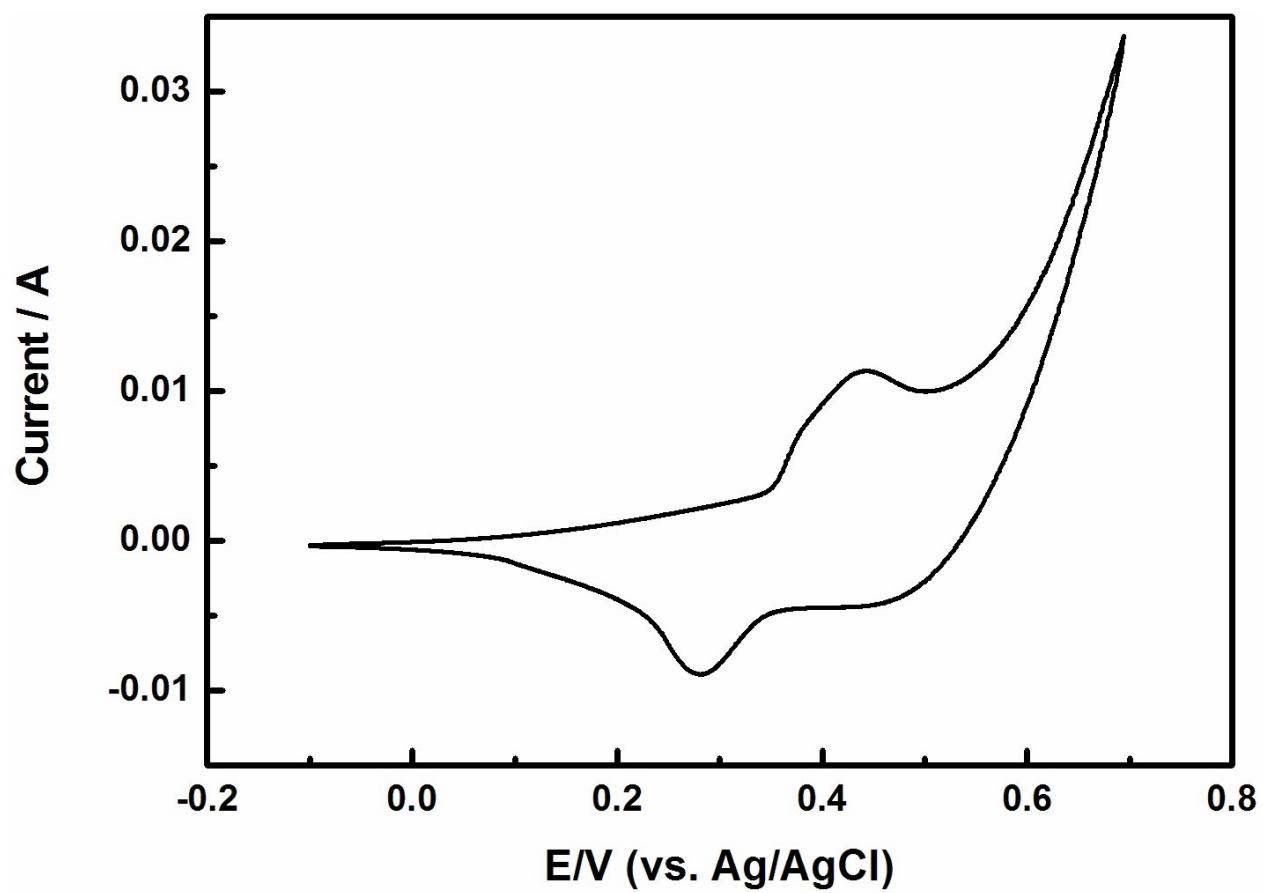

**Fig. S11** CV behavior of CuS modified nickel foam electrode at a scan rate of  $5 \text{ mVs}^{-1}$  in 2 M NaOH solution.

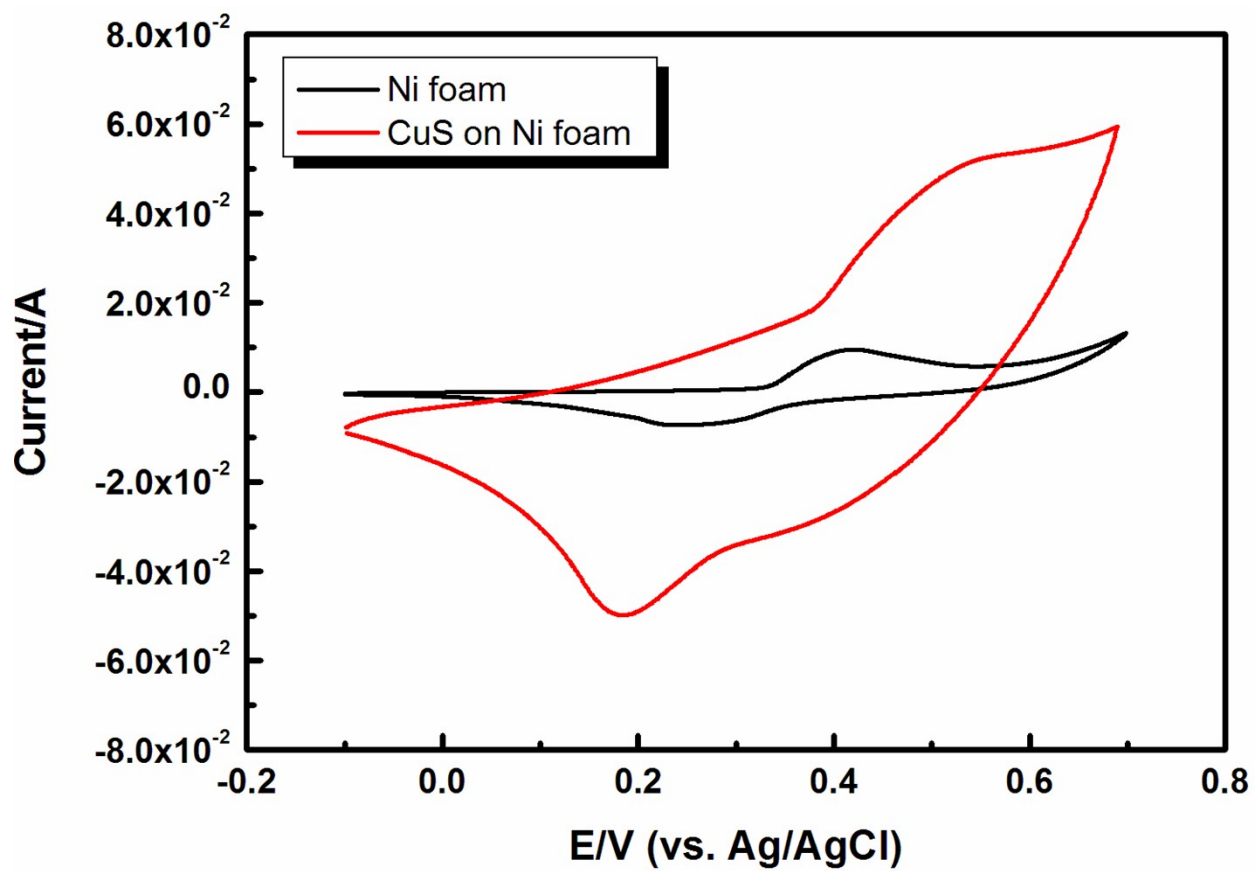

**Fig. S12** CV behavior of CuS modified nickel foam and bare nickel foam electrode at a scan rate of  $50 \text{ mVs}^{-1}$  in 2 M NaOH solution.

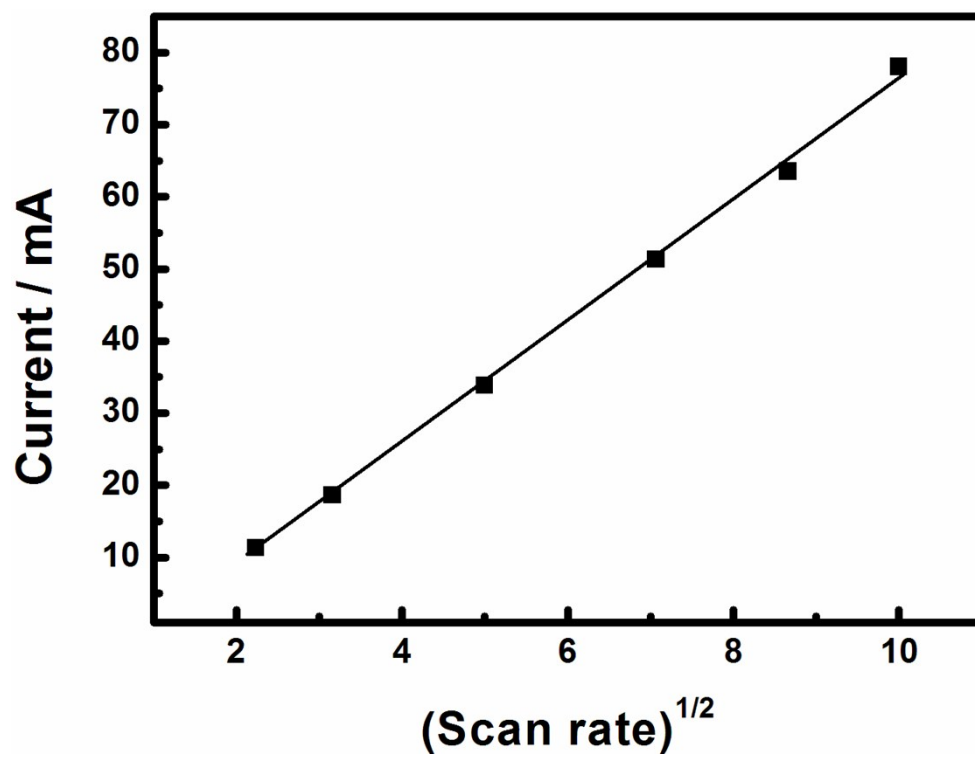

Fig. S13 Peak current vs. square root of the scan rate.

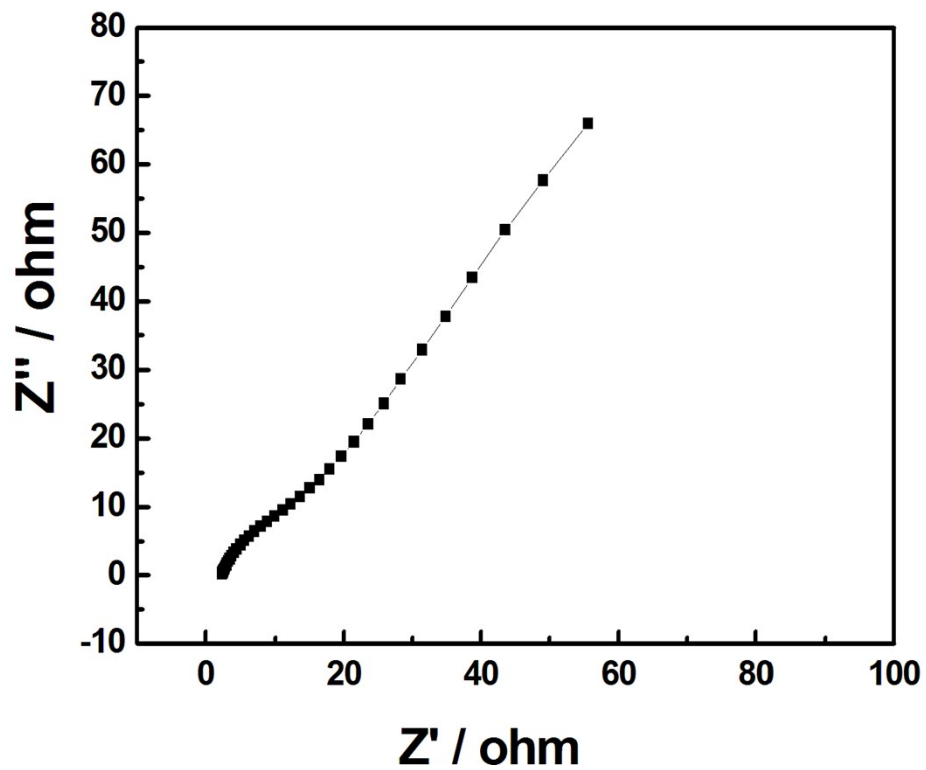

**Fig. S14** Electrochemical impedance spectrum as Nyquist plot of CuS electrode

**Table S1** Comparison of the catalytic rate constant ( $k$ ) of different modified electrodes for electrocatalytic oxidation of methanol reported in literature

| Electrode          | Modifier                                              | $K/\text{cm}^3 \text{ mol}^{-1} \text{ s}^{-1}$ | Ref.      |
|--------------------|-------------------------------------------------------|-------------------------------------------------|-----------|
| Carbon rod         | Ni-MnO <sub>x</sub> /C                                | $3.26 \times 10^3$                              | [1]       |
| Carbon steel plate | Ni-Cu-P alloy                                         | $1.40 \times 10^4$                              | [2]       |
| Carbon paste       | Ni(OH) <sub>2</sub> -NiCo <sub>2</sub> O <sub>4</sub> | $1.16 \times 10^2$                              | [3]       |
| Glassy carbon      | NiMn-salenA                                           | $7.56 \times 10^3$                              | [4]       |
| Carbon paste       | Ni/ZIF-8                                              | $1.31 \times 10^4$                              | [5]       |
| Glassy carbon      | Poly(Ni-Curcumin)                                     | $2.04 \times 10^3$                              | [6]       |
| Glassy carbon      | CuS                                                   | $7.44 \times 10^5$                              | This work |

[1] R.M.A. Hameed, Appl. Surf. Sci. 357 (2015) 417-428.

[2] L-S. Yuan, Y-X. Zheng, M-L. Jia, S-J. Zhang, X-L. Wang, C. Peng, Electrochim. Acta 154 (2015) 54-62

[3] M.U.A. Prathap, B. Satpati, R. Srivastava, Electrochim. Acta 130 (2014) 368-380.

[4] W. wang, R. Li, R. Zhang, J. Ma, B. Wang, J. Electroanal. Chem. 742 (2015) 110-121.

[5] S-M. Abdolraouf, S. Ghasemi, G-R. Hamid, J. Power. Sources 303 (2016) 379-387.

[6] A. Ciszewski, G. Milczarek, B. Lewandowska, K. Krutowski, Electroanalysis 15 (2003) 518-523.
